# Supplementary material for: Adaptation to prolonged neuromodulation in cortical cultures: an invariable return to network synchrony
Source: PubMed Central journal article supplement (PMC4237737; doi:10.1186/s12915-014-0083-3), 2014-10-23
Supplement: 12915_2014_83_MOESM8_ESM.pdf [file 12915_2014_83_MOESM8_ESM.pdf]

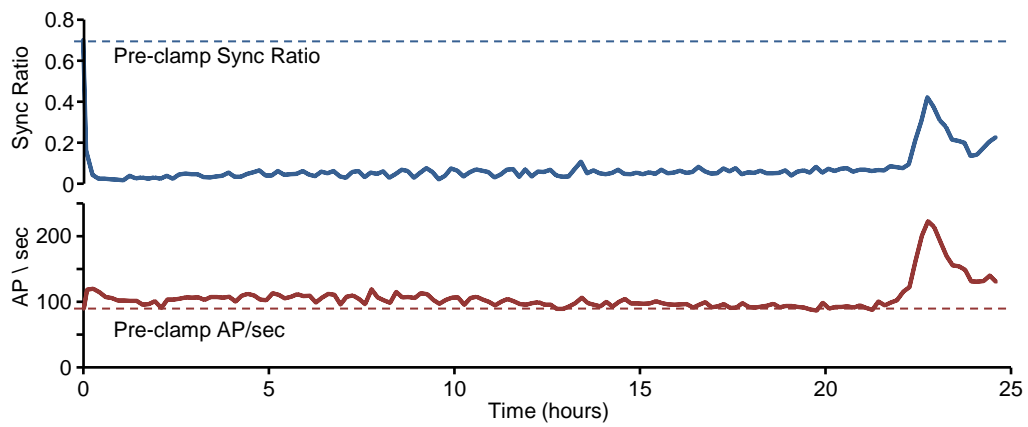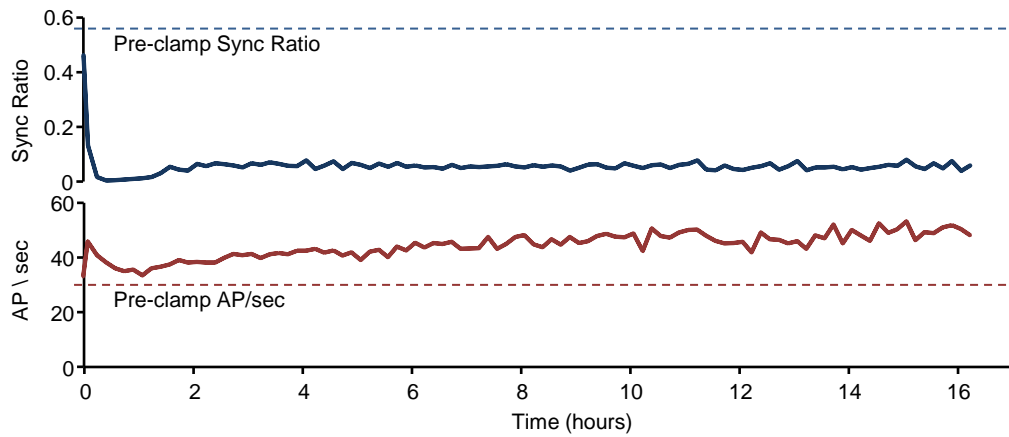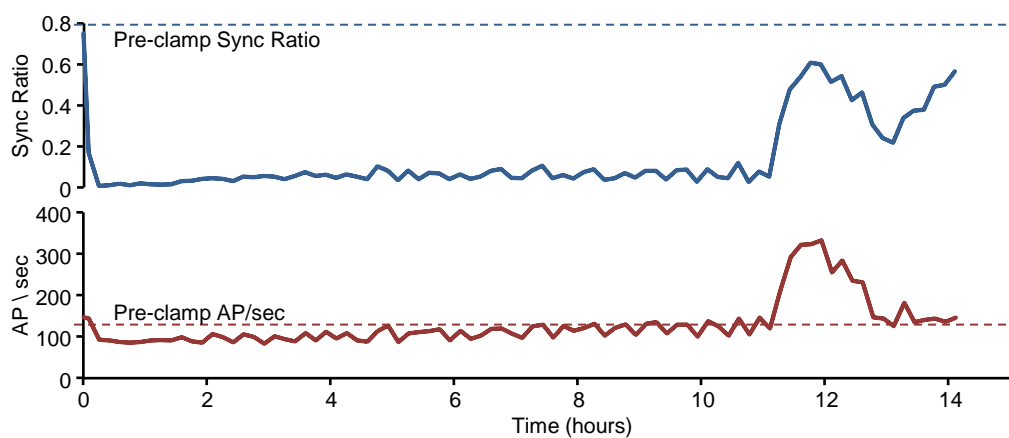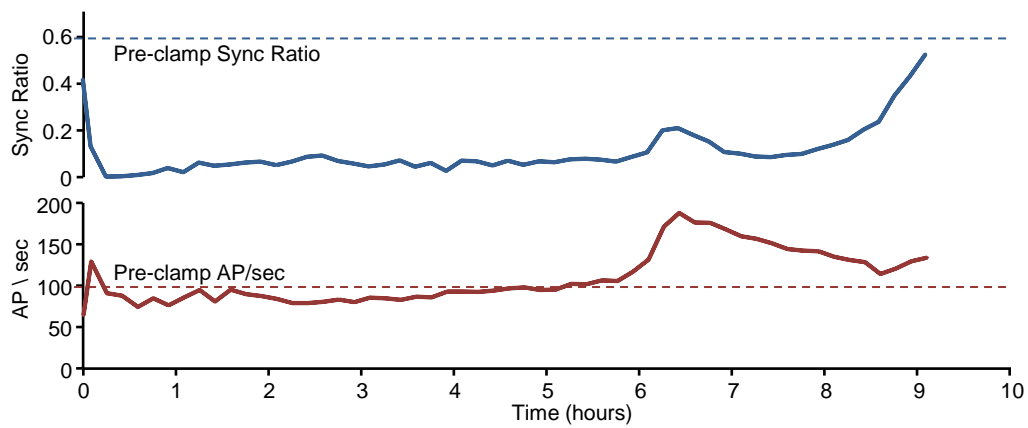

Kaufman et al.  
Supplementary Figure 7
